# Supplementary material for: Bimodal modulation of in vitro angiogenesis with photoactive polymer nanoparticles
Source: Royal Society of Chemistry journal article supplement (doi:10.1039/d3nr02743k), 2023-01-01
Supplement: d3nr02743k1.pdf [file d3nr02743k1.pdf]

## Bimodal modulation of *in vitro* angiogenesis by photoactive polymer nanoparticles

Gabriele Tullii, <sup>a,\*</sup> Edgar Gutierrez-Fernandez, <sup>b</sup> Carlotta Ronchi, <sup>a</sup> Christian Bellacanzone, <sup>a</sup> Luca Bondi, <sup>c</sup> Miryam Criado-Gonzalez, <sup>b</sup> Paola Lagonegro, <sup>a</sup> Francesco Moccia, <sup>d</sup> Tobias Cramer, <sup>c</sup> David Mecerreyes, <sup>b,e</sup> Jaime Martín <sup>b,f</sup> and Maria Rosa Antognazza <sup>a,\*</sup>

<sup>a</sup>Center for Nano Science and Technology, Istituto Italiano di Tecnologia, Via Rubattino 81, 20134 Milano, Italy.

<sup>b</sup>POLYMAT, University of the Basque Country UPV/EHU, Paseo Manuel de Lardizabal 3, 20018 Donostia-San Sebastián, Spain.

<sup>c</sup>DiFA University of Bologna, Viale Carlo Berti Pichat 6/2 Bologna, 40127, Italy.

<sup>d</sup>Department of Biology and Biotechnology “Lazzaro Spallanzani”, University of Pavia, 27100 Pavia, Italy

<sup>e</sup>Ikerbasque, Basque Foundation for Science, 48013 Bilbao, Spain.

<sup>f</sup>Universidade da Coruña, Campus Industrial de Ferrol, CITENI, Campus Esteiro S/N, 15403 Ferrol, (Spain)

\*Corresponding authors.

E-mail addresses: [gabriele.tullii@iit.it](mailto:gabriele.tullii@iit.it), [MariaRosa.Antognazza@iit.it](mailto:MariaRosa.Antognazza@iit.it).

### Supporting Information

**Table S1.** Mean diameters and standard deviation obtained from lognormal approximation from DLS and TEM data.

| Conjugated polymer:Pluronic F127      | P3HT      | PTB7      | PBDB-T    |
|---------------------------------------|-----------|-----------|-----------|
| <b>Dynamic Light Scattering (DLS)</b> |           |           |           |
| <b>9:1</b>                            | 327 ± 69  | 260 ± 87  | 273 ± 101 |
| <b>3:1</b>                            | 275 ± 127 | 256 ± 114 | 275 ± 152 |
| <b>1:1</b>                            | 244 ± 93  | 255 ± 123 | 227 ± 121 |
| <b>TEM</b>                            |           |           |           |
| <b>9:1</b>                            | 185 ± 100 | 131 ± 44  | 127 ± 52  |
| <b>3:1</b>                            | 150 ± 49  | 98 ± 49   | 112 ± 32  |
| <b>1:1</b>                            | 137 ± 41  | -         | -         |

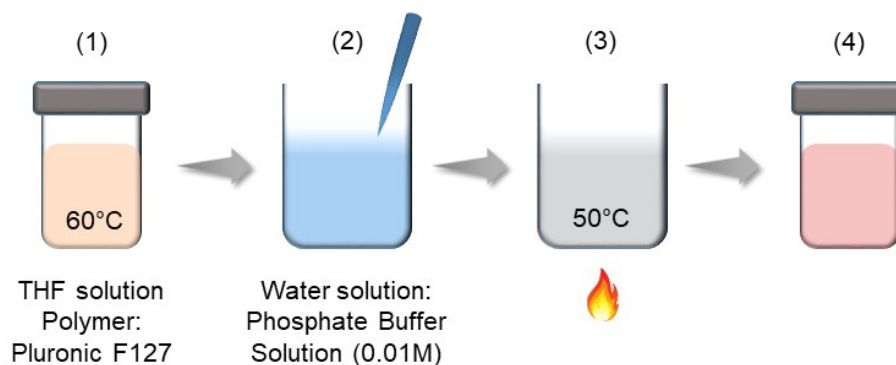

**Figure S1.** Scheme of flash nanoprecipitation method employed in this work to generate the nanoparticles: (1) the mix of polymers is solved in THF, (2) 1 mL of the polymer solution is injected into 10 mL of PBS solution in water, (3) evaporation of THF from the water, (4) final colloid of spherical polymer nanoparticles in dispersed in water.

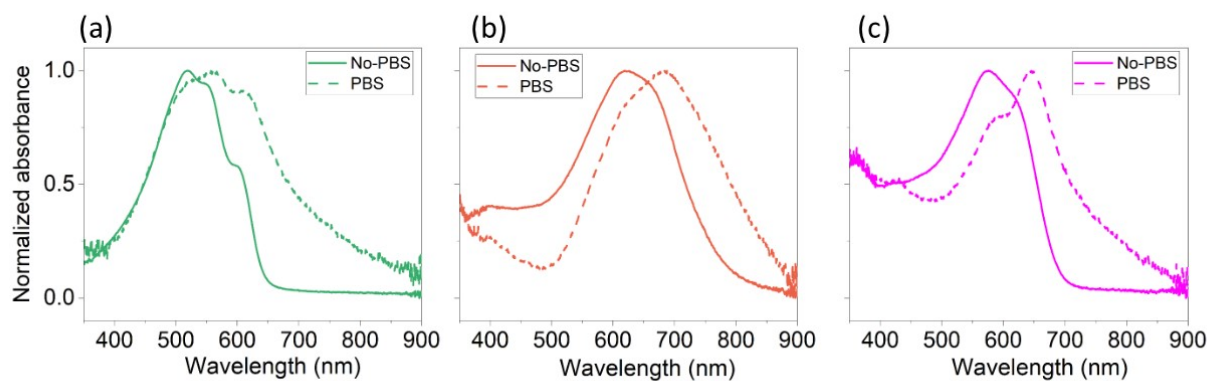

**Figure S2.** UV-vis absorbance spectra of (a) P3HT), (b) PTB7 and (c) PBDB-T nanoparticles prepared in water with or without PBS at 9:1 mass relation of polymer:Pluronic® F127.

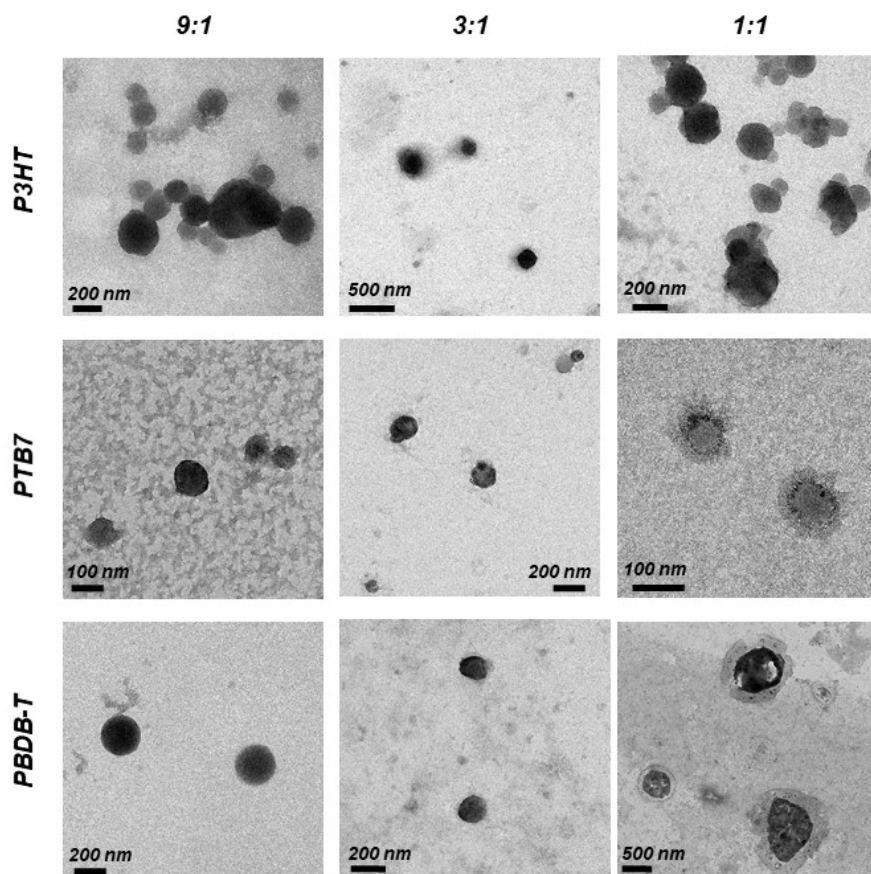

**Figure S3.** TEM images of the conjugated polymer NPs prepared at different Polymer:Pluronic® F127 mass ratios.

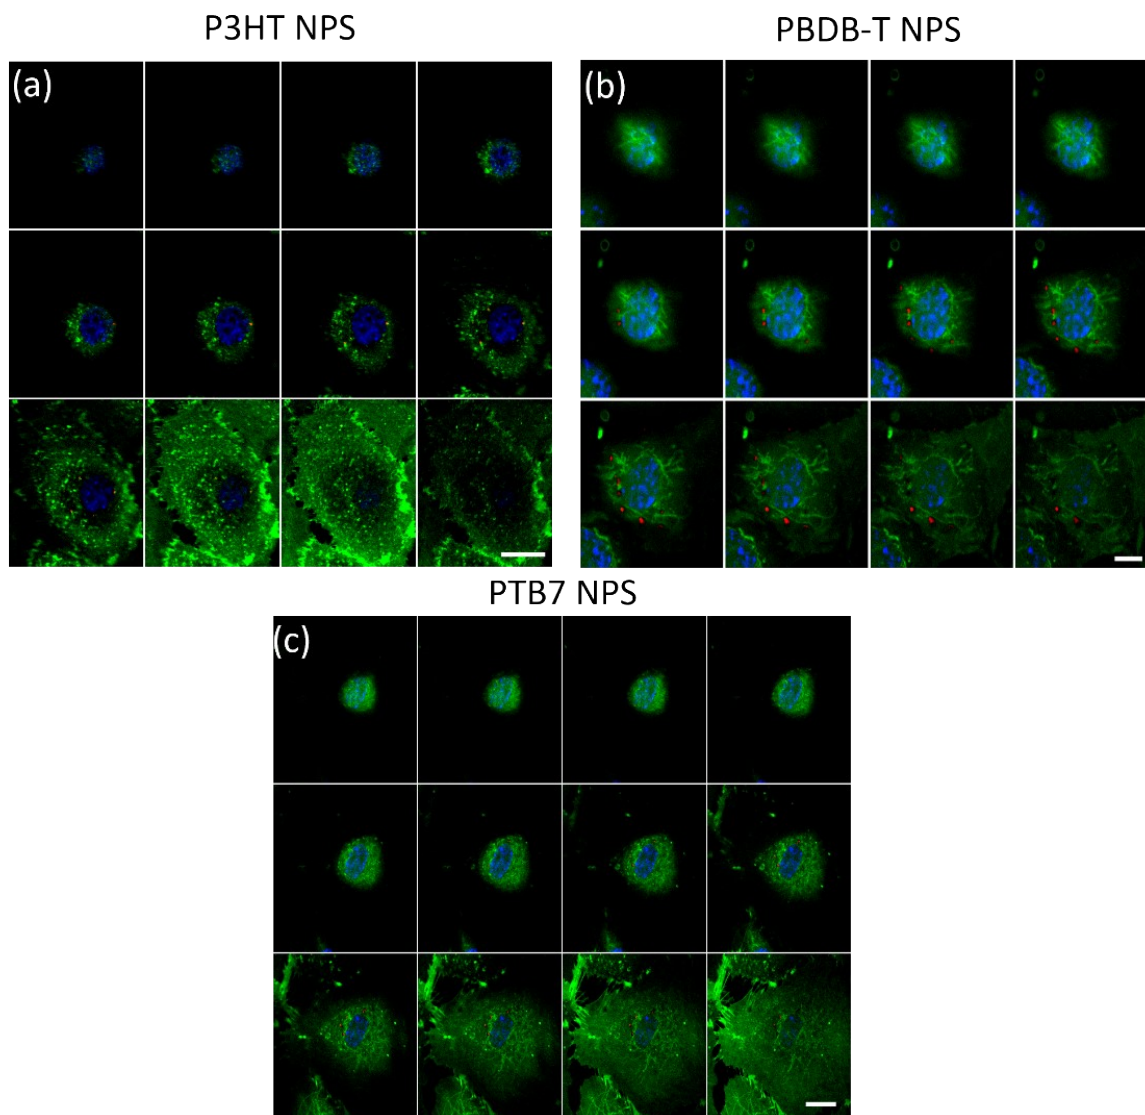

**Figure S4.** Confocal optical sections depicting HUVEC cells treated with P3HT, PBDB-T and PTB7 NPs. Cells are stained with Cell mask green (membrane, green) and Hoechst 33342 (nuclei, blue), Nps emission is depicted in red. Focal planes are acquired from the top interface with the extracellular bath (upper left) to the bottom of the cells (lower right). Scale bars 5  $\mu\text{m}$ .

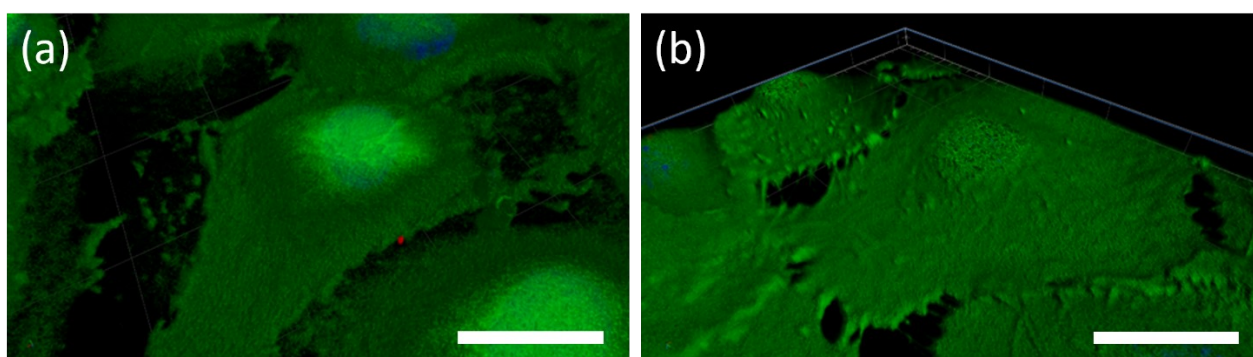

**Figure S5.** 3D reconstruction of confocal images depicting HUVECs treated with PBDB-T (a) and PTB7 NPs (b). Cells are stained with Cell mask green (membrane, green) and Hoechst 33342 (nuclei, blue). Scale bars 10  $\mu\text{m}$ . Arivis software was employed for the analysis.

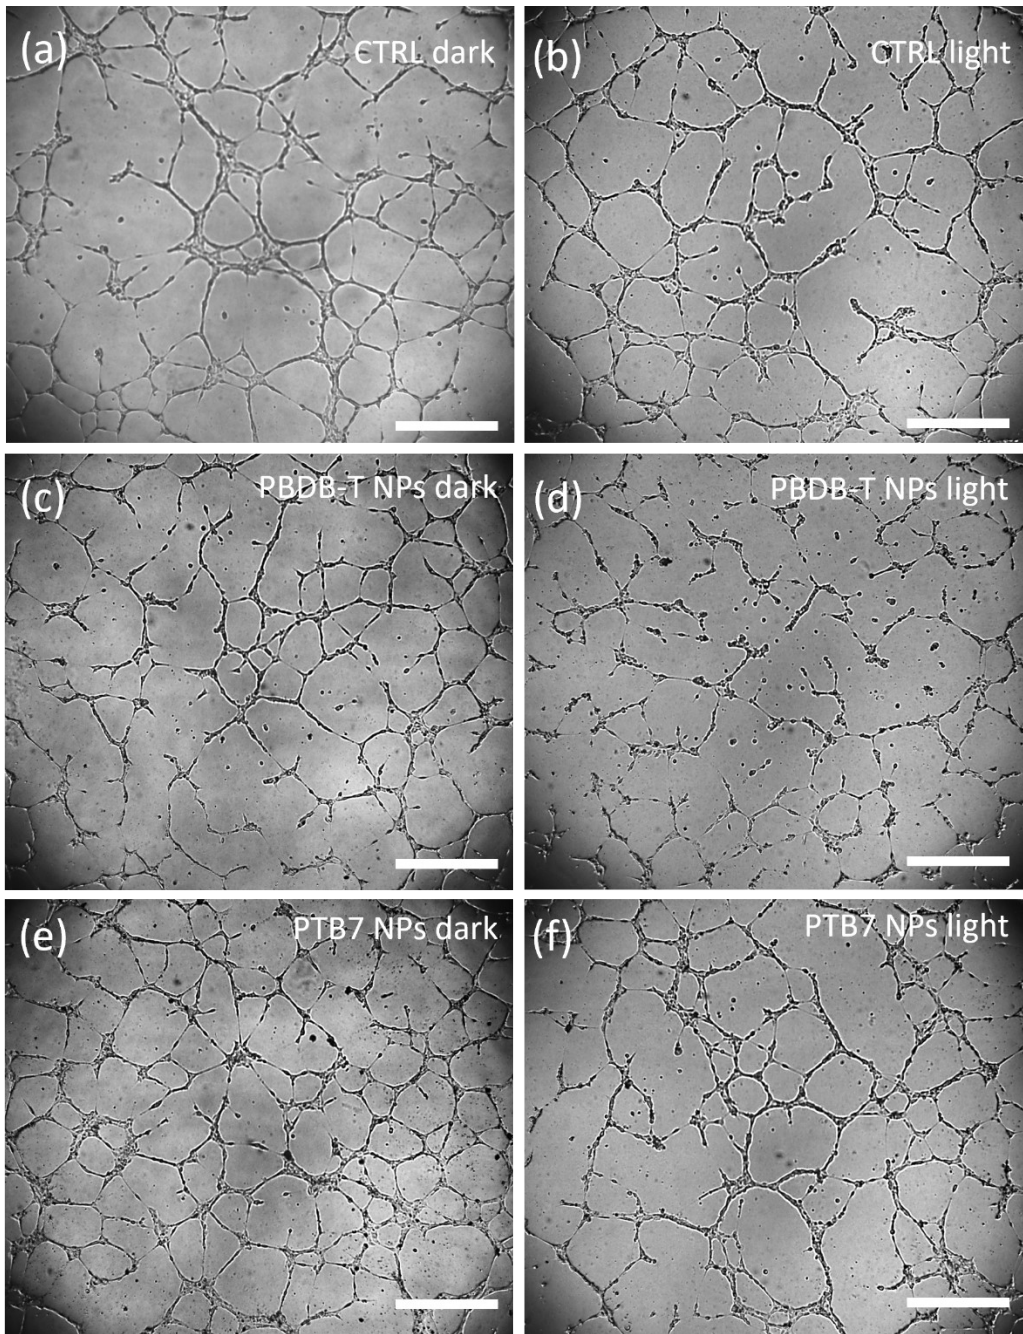

**Figure S6.** Representative bright field images depicting the capillary-like network formed by HUVECs during the *in vitro* angiogenesis assay in all the considered conditions. Scale bars 500 µm.

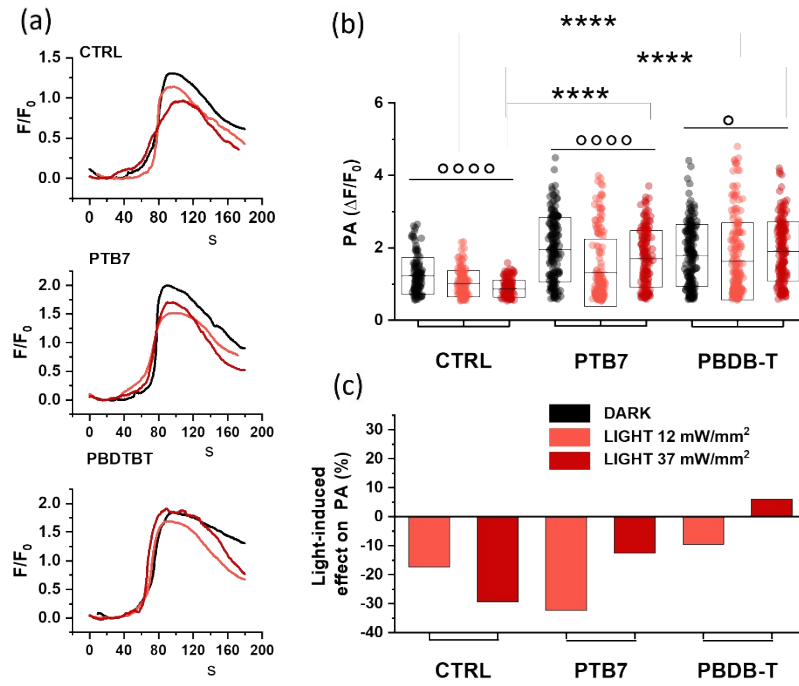

**Figure S7.** (a) Representative traces of  $\text{Ca}^{2+}$  dynamics in HUVEC cells, without NPs (top) and loaded with PTB7 (middle) and PBDB-T (bottom) NPs. (b) Average peak amplitude (PA) of the Intracellular  $\text{Ca}^{2+}$  responses measured in HUVECs in absence (CTRL) and in presence of PTB7 and PBDB-T NPs, in dark and upon light excitation (660nm LED, 12 and 37  $\text{mW}/\text{mm}^2$ ). Photoexcitation of the Fluo4-AM probe (Ex/Em 488/515 nm) is provided by 474 nm light source (5  $\text{mW}/\text{mm}^2$ ). (c) PA percentage variation, as induced by red light photoexcitation at two photoexcitation densities. Cells number N: CTRL N > 110, PTB7 N > 170, PBDB-T N > 170; \*  $p < 0.05$  vs CTRL (Mann-Whitney test), o Kruskal-Wallis ANOVA.

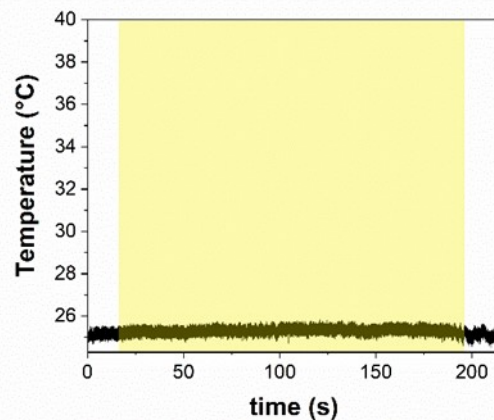

**Figure S8.** Local temperature measurement through the calibrated pipette method. The experiment was carried out with a patch clamp set up (Crisel instruments) in voltage clamp configuration by applying a constant current of  $I_0 = 4$  nA at room temperature, in KRH extracellular solution. The yellow shaded area represents the light excitation (660nm, 3min, 37  $\text{mW}/\text{mm}^2$ ). The light-induced measured current is related to the temperature variation through the following relation:

$$T = \frac{1}{\frac{1}{T_0} - \frac{R}{E_a} \log_{10}\left(\frac{I}{I_0}\right)}$$

where  $I_0$  is the current flowing through the pipette at the basal temperature  $T_0$ ,  $R$  is the ideal gas constant and  $E_a$  is the activation energy.  $E_a$  was obtained by measuring the current response flowing through the pipette for a potential step of  $\Delta V = 5$  mV at different values of the bath temperature, controlled with a volume-controlling chamber (Warner Instruments), and plotting the measured currents against the temperature in an Arrhenius plot.
